# Supplementary material
Source: publisher figshare collection journal article supplement (https://frontiersin.figshare.com/ndownloader/files/20022203)
Supplement: Supplementary file [file 20022203]

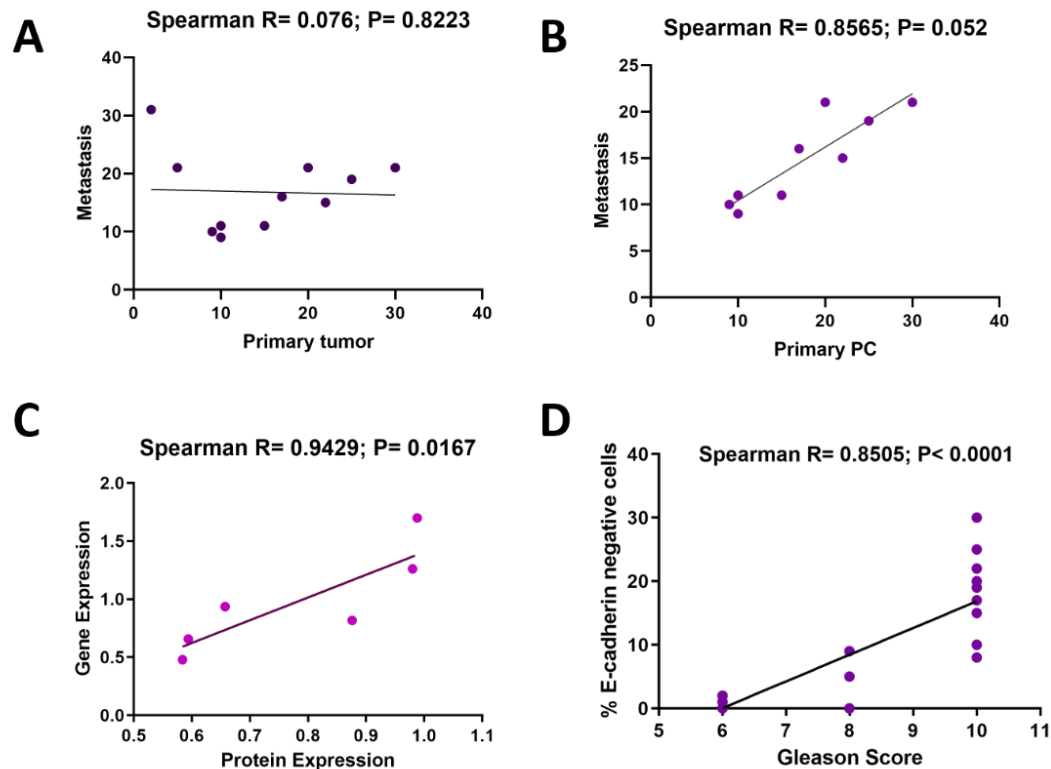

**Supplementary Figure 1.** Spearman correlation test was applied to compare *CDH1* gene or protein expression with clinical variables. **A:** No significant correlation was found comparing E-cadherin expression in primary tumors versus their paired metastatic lesions. **B:** Positive correlation between the number of E-cadherin negative cells in primary tumors and their paired metastasis. **C:** Positive correlation was detected between *CDH1* expression versus protein expression. **D:** Positive correlation was found between the number of E-cadherin negative cells and Gleason score.
